# Supplementary material
Source: PubMed Central journal article supplement (PMC9015969)
Supplement: 10875_2021_1190_MOESM1_ESM.pdf [file 10875_2021_1190_MOESM1_ESM.pdf]

## Demographics and clinical characteristics of study subjects

| Subject ID | Sex | Age at vaccination (years) | N. of vaccine shots | COVID-19                 | Symptoms category at first COVID-19 | Symptoms category at second COVID-19 | Days from symptoms onset to first vaccination (range) | SARS-CoV-2 alpha nAbs and RBD IgG at baseline |
|------------|-----|----------------------------|---------------------|--------------------------|-------------------------------------|--------------------------------------|-------------------------------------------------------|-----------------------------------------------|
| PZV1       | F   | 56-60                      | 2                   | Naïve                    |                                     |                                      |                                                       | No                                            |
| PZV2       | M   | 61-65                      | 2                   | Naïve                    |                                     |                                      |                                                       | No                                            |
| PZV3       | F   | 26-30                      | 2                   | Naïve                    |                                     |                                      |                                                       | No                                            |
| PZV4       | F   | 26-30                      | 2                   | Naïve                    |                                     |                                      |                                                       | No                                            |
| PZV5       | M   | 31-35                      | 2                   | Naïve                    |                                     |                                      |                                                       | No                                            |
| PZV6       | M   | 31-35                      | 2                   | Naïve                    |                                     |                                      |                                                       | No                                            |
| PZV7       | F   | 56-60                      | 2                   | Naïve                    |                                     |                                      |                                                       | No                                            |
| PZV8       | F   | 56-60                      | 2                   | Naïve                    |                                     |                                      |                                                       | No                                            |
| PZV9       | F   | 36-40                      | 2                   | Naïve                    |                                     |                                      |                                                       | No                                            |
| PZV10      | F   | 41-45                      | 2                   | Naïve                    |                                     |                                      |                                                       | No                                            |
| PZV11      | M   | 31-35                      | 2                   | Naïve                    |                                     |                                      |                                                       | No                                            |
| PZV12      | F   | 46-50                      | 2                   | Naïve                    |                                     |                                      |                                                       | No                                            |
| PZV13      | M   | 36-40                      | 2                   | Naïve                    |                                     |                                      |                                                       | No                                            |
| PZV14      | F   | 26-30                      | 2                   | First wave               | asymptomatic                        |                                      | unknown                                               | Yes                                           |
| PZV15      | F   | 56-60                      | 1                   | First wave               | moderate                            |                                      | 350-400                                               | Yes                                           |
| PZV16      | F   | 46-50                      | 1                   | First wave               | mild                                |                                      | 250-300                                               | Yes                                           |
| PZV17      | F   | 41-45                      | 2                   | First wave               | mild                                |                                      | 300-350                                               | Yes                                           |
| PZV18      | F   | 51-55                      | 2                   | First wave               | mild                                |                                      | 250-300                                               | Yes                                           |
| PZV19      | F   | 51-55                      | 2                   | First wave               | asymptomatic                        |                                      | 300-350                                               | No                                            |
| PZV20      | M   | 31-35                      | 2                   | First wave               | mild                                |                                      | 300-350                                               | Yes                                           |
| PZV21      | F   | 66-70                      | 2                   | First wave               | mild                                |                                      | 300-350                                               | No                                            |
| PZV22      | F   | 56-60                      | 2                   | First wave               | mild                                |                                      | 300-350                                               | Yes                                           |
| PZV23      | F   | 46-50                      | 2                   | First wave               | asymptomatic                        |                                      | >250                                                  | No                                            |
| PZV24      | F   | 51-55                      | 2                   | First wave – Second wave | moderate                            | asymptomatic                         | 300-350                                               | Yes                                           |
| PZV25      | F   | 46-50                      | 2                   | First wave – Second wave | mild                                | asymptomatic                         | 250-300                                               | Yes                                           |
| PZV26      | M   | 31-35                      | 2                   | First wave – Second wave | asymptomatic                        | asymptomatic                         | >200                                                  | No                                            |
| PZV27      | F   | 46-50                      | 2                   | Second wave - 2020       | mild                                | mild                                 | 50-100                                                | Yes                                           |
| PZV28      | F   | 51-55                      | 2                   | Second wave              | asymptomatic                        |                                      | 50-100                                                | No                                            |
| PZV29      | F   | 26-30                      | 2                   | Second wave              | mild                                |                                      | 50-100                                                | No                                            |
| PZV30      | M   | 61-65                      | 2                   | Second wave              | mild                                |                                      | 50-100                                                | Yes                                           |
| PZV31      | F   | 31-35                      | 2                   | Second wave              | mild                                |                                      | 50-100                                                | Yes                                           |

## ID50 geometric mean titer post BNT162b2 vaccination

|                        | HCW naïve  |       |      |       | HCW with prior COVID-19<br>nAbs negative at baseline |       |      |       | HCW with prior COVID-19<br>nAbs positive at baseline |       |      |       |
|------------------------|------------|-------|------|-------|------------------------------------------------------|-------|------|-------|------------------------------------------------------|-------|------|-------|
|                        | Wuhan-Hu-1 | alpha | beta | delta | Wuhan-Hu-1                                           | alpha | beta | delta | Wuhan-Hu-1                                           | alpha | beta | delta |
| <b>Day 31 post Vax</b> | 1301       | 732   | 210  | 487   | 2448                                                 | 959   | 305  | 708   | 13114                                                | 12582 | 3688 | 7609  |
| <b>Day 64 post Vax</b> | 482        | 312   | 48   | 94    | 571                                                  | 285   | 66   | 195   | 5723                                                 | 6072  | 1268 | 3310  |
| <b>Day 64/31 ratio</b> | 0.37       | 0.43  | 0.23 | 0.19  | 0.23                                                 | 0.3   | 0.22 | 0.27  | 0.43                                                 | 0.48  | 0.34 | 0.43  |

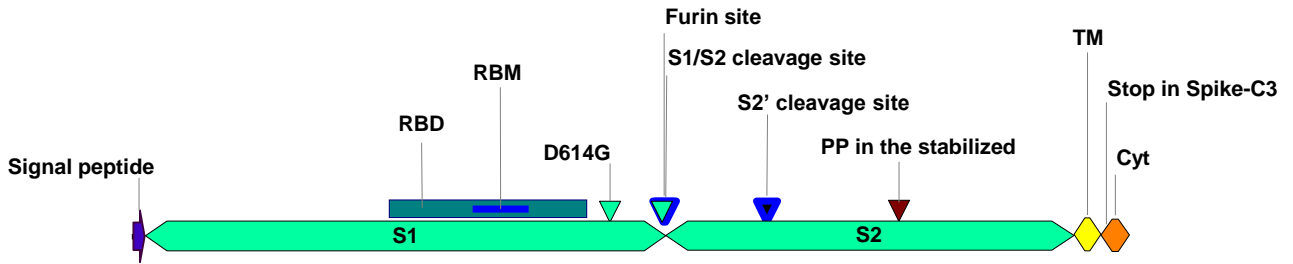

## Nab assay antigens

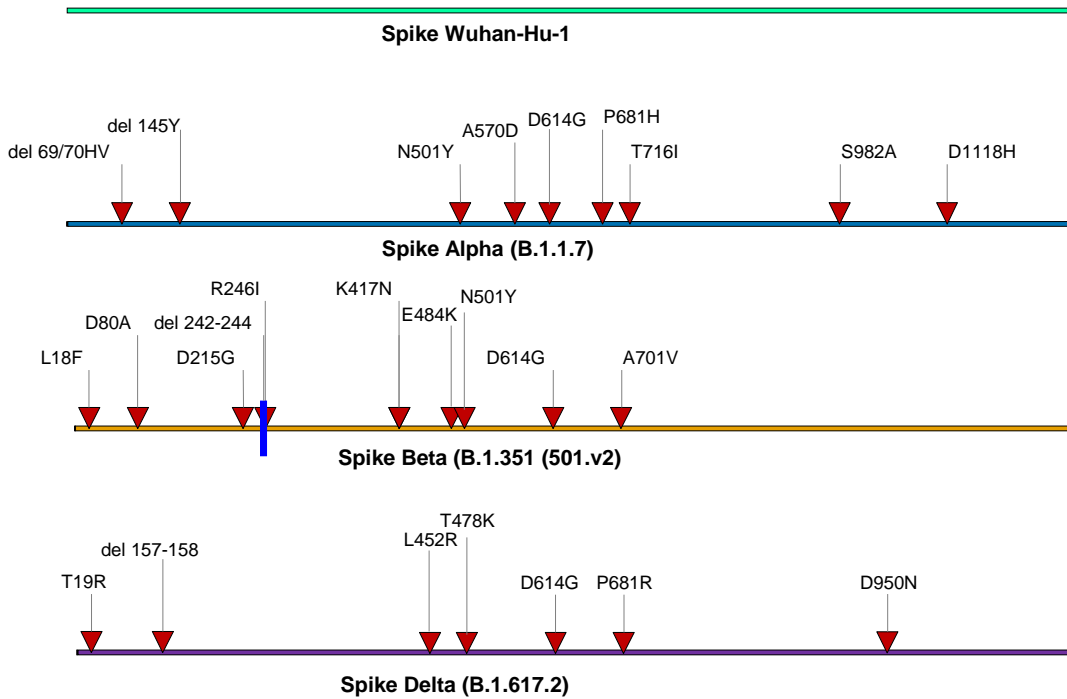

## LIPS antigens

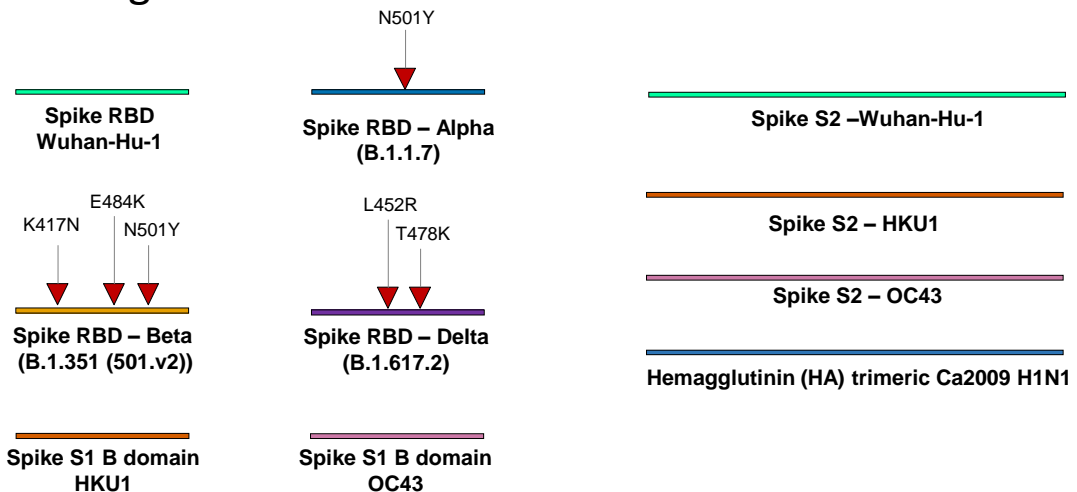

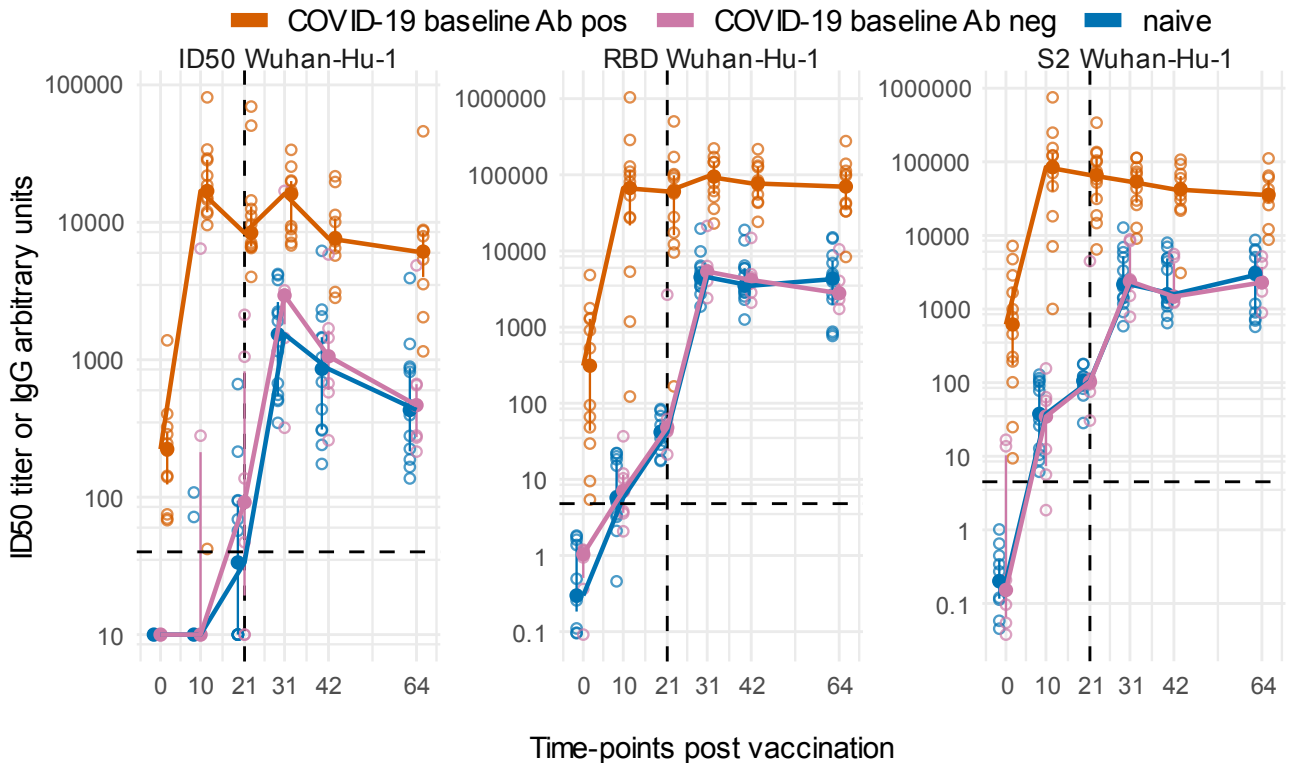

**Antibody responses against Wuhan-Hu-1 spike antigens in BNT162b2 vaccinees stratified by SARS-CoV-2 Ab status at baseline** Lineplots show the temporal profile post BNT162b2 vaccination of ID50 titers or IgG arbitrary units against the Spike RBD or S2 domains. Vaccinees are stratified according to previous infection with SARS-CoV-2 into naïve or with previous COVID-19 either without or with SARS-CoV-2 neutralizing and RBD antibodies at baseline before vaccination (COVID-19 baseline Ab neg or COVID-19 baseline Ab pos, respectively). Filled circles with error bars correspond to median  $\pm$  IQR at the indicated timepoints. Empty circles correspond to individual subject values. Horizontal dashed lines indicate the respective assay threshold for positivity. The vertical dashed line indicates the second vaccine jab timepoint.

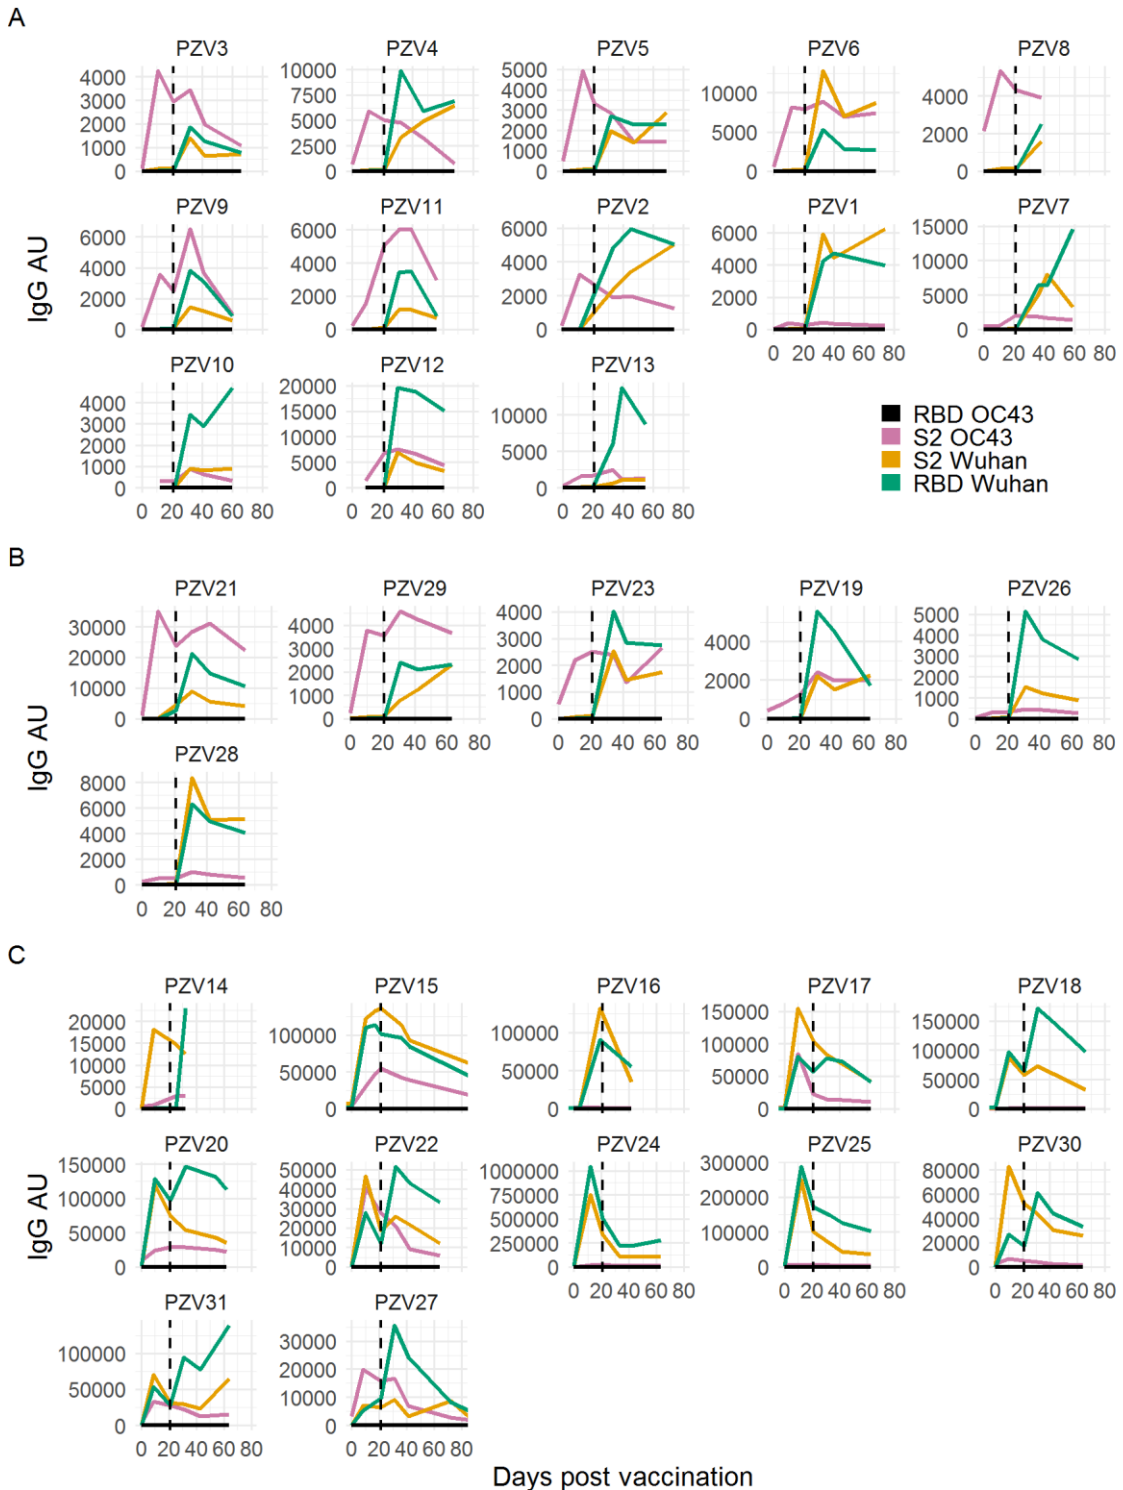

**The early boost of seasonal betacoronavirus OC43 antibodies induced by BNT162b2-Comirnaty vaccination is directed against the spike S2 subunit but not the Spike S1 B domain.** Lineplots of IgG arbitrary units (AU) against SARS-CoV-2 Wuhan-Hu-1 Spike S 1 RBD, Wuhan-Hu-1 spike S2 subunit, OC43 Spike S1 B domain, and OC43 spike S2 subunit at sequential time-points after vaccination. Vaccinees are stratified as: subjects naïve for SARS-CoV-2 infection (Panel A, n=13), subjects with prior confirmed COVID-19 presenting at vaccination either without Wuhan-Hu-1 nAbs and RBD IgGs (Panel B, n=6) and with prior COVID-19 and SARS-CoV-2 antibodies at baseline (Panel C, n=12). The vertical dashed line indicates the 2nd vaccine jab.

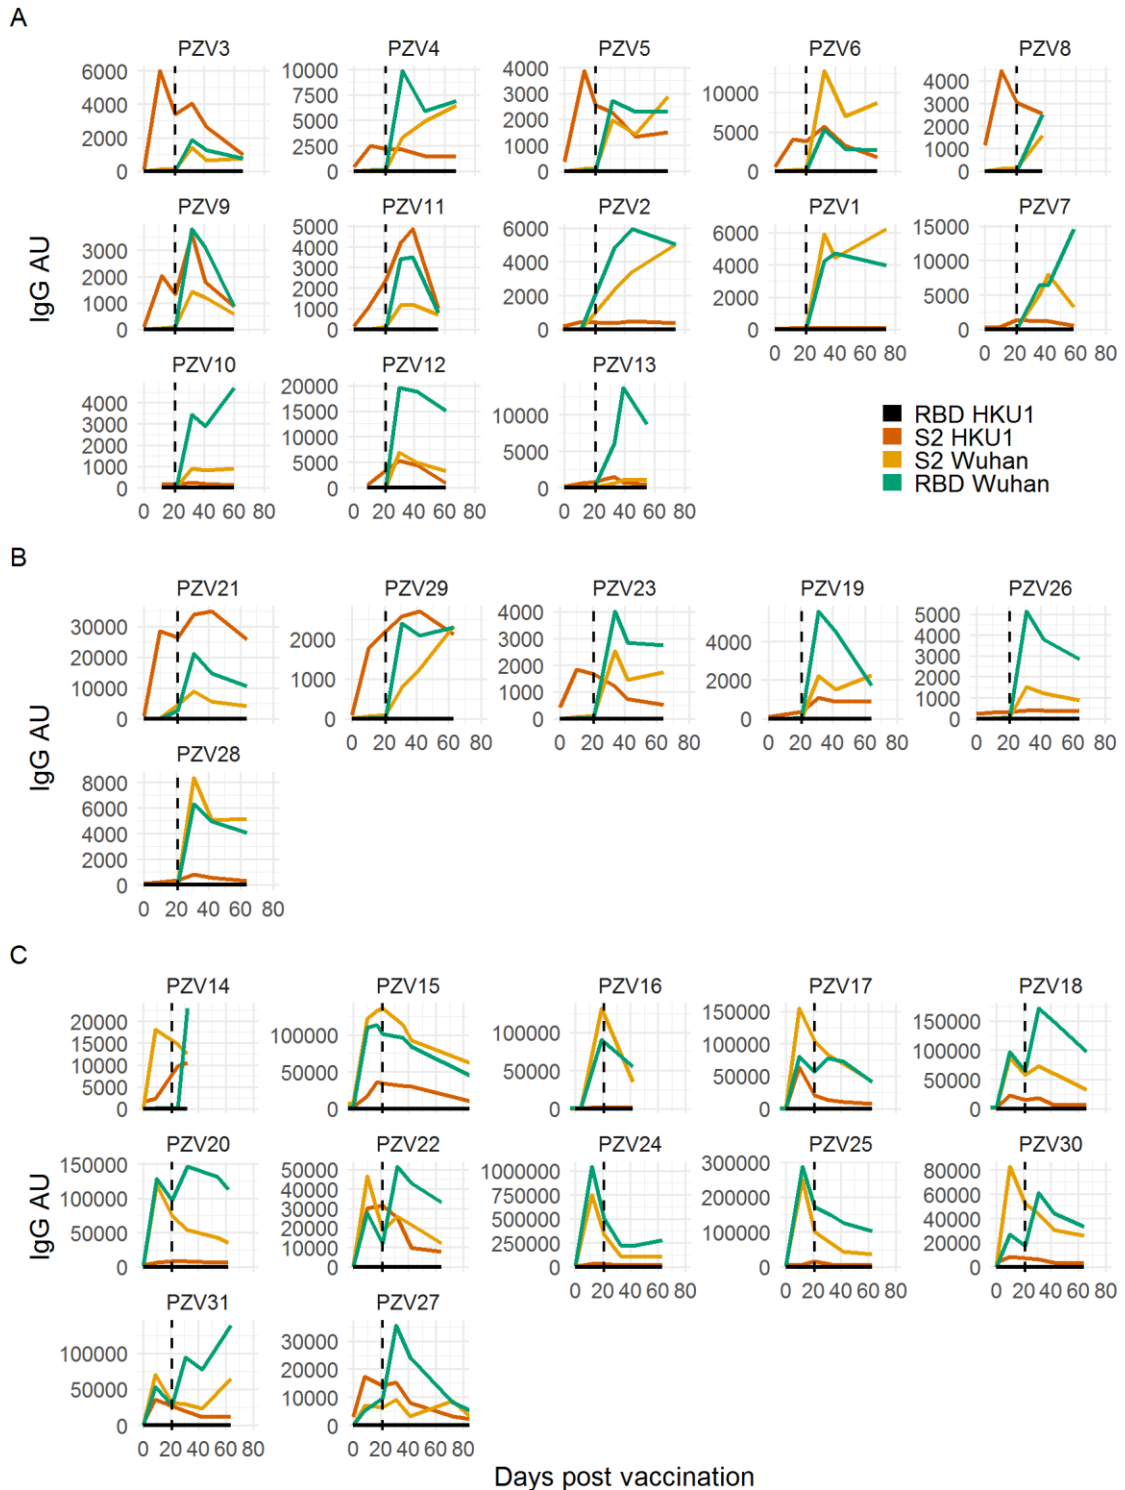

**The early boost of seasonal betacoronavirus HKU1 antibodies induced by BNT162b2-Comirnaty vaccination is directed against the spike S2 subunit but not the Spike S1 B domain.** Lineplots of IgG arbitrary units (AU) against SARS-CoV-2 Wuhan-Hu-1 Spike S 1 RBD, Wuhan-Hu-1 spike S2 subunit, HKU1 Spike S1 B domain, and HKU1 spike S2 subunit at sequential time-points after vaccination. Vaccinees are stratified as: subjects naïve for SARS-CoV-2 infection (Panel A, n=13), subjects with prior confirmed COVID-19 presenting at vaccination either without Wuhan-Hu-1 nAbs and RBD IgGs (Panel B, n=6) and with prior COVID-19 and SARS-CoV-2 antibodies at baseline (Panel C, n=12). The vertical dashed line indicates the 2nd vaccine jab.

A

Identities 28/108 (26%) Conservative substitutions 17/108 (16%)

```

OC43 S1 B domain   PDLPN-CNIEAWLNDKSVPSPLNWERKTFSSNCNFMSSLMFSFIQADSFTCNNIDAAKIYG
SARS-CoV-2 S1 RBD P++ N C      N      S      W RK  SNC  + S L +      +F C +      K+
OC43 S1 B domain   MCFSSITIDKFAIPNRRKVDLQLGNLGYLQSSNYRIDTTATSCQLYYN   107
SARS-CoV-2 S1 RBD +CF+++ D F I      + G G +      NY++      T C + +N
LCFTNVYADSFVIRGDEVQRQIAPGQTKGIADYNYKLPDDFTGCVIAWN   119

```

B

Identities 220/513 (43%) Conservative substitutions 87/513 (17%)

```

OC43 S2 EC   IQIPSEFTIGNMEEFIQTSSPKVTIDCAAFVCGDYAACKLQLVEYGSFCDNINAILTEVN
SARS-CoV-2 S2 EC I IP+ FTI      E + S K ++DC ++CGD C L++YGSFC +N LT +
IAIPNFTNISVTEILPVSMTKTSVDCTMYICGDSTECNLLLQYGSFCTQLNRALTGIA

OC43 S2 EC   ELLDTTQLQVANSLMNGVTLSTKLKDG VNFVDDINFAPVLGCLGSECSKASSRS AIEDL
SARS-CoV-2 S2 EC D      +V + + + + +KD FN I P      SK S RS IEDL
VEQDKNTQEVF-AQVKQIYKTPPIKDFGGFNFSQILPDP-----SKPSKRSFIEDL

OC43 S2 EC   LFDKVKLSDVGFVEAYNCTGGAEIRDLCVQSYKGIKVLPPLLSENQISGYTLAATSAS
SARS-CoV-2 S2 EC LF+KV L+D GF++ Y +C G      RDLIC Q + G+ VLPPLL++ I+ YT A + +
LFNKVTLADAGFIKQYGDCLGDI AARDLICAQKFNGLTVLPPLLTDEMI AQYTSALLAGT

OC43 S2 EC   LFPWPATAAG----VPFYLVNQYRINGLVMTDVLVSNQKLIANAFNNALHAIQQGF DAT
SARS-CoV-2 S2 EC + WT AG      +PF + + YR NG+GVT +VL +NQKLIAN FN+A+ IQ      +T
ITSGWTFGAGAAALQIPFAMQMAYRFNGIGVTVQNVLYENQKLIANQFN SAIGKIQDSL SST

OC43 S2 EC   NSALVKIQAVVNSEALNNLLQQLSNRFGAISASLQEI LSRLDALEAEA QIDRLINGRL
SARS-CoV-2 S2 EC SAL K+Q VVN N++ALN L++QLS+ FGAIS+ L +ILSRLD +EAE QIDRLI GRL
ASALGKQLQDVVNQNAQALNTLVKQLSSNFGAISSV LNDILSRLDKVEAEVQIDRLITGRL

OC43 S2 EC   TALNAYVSQQLSDSTLVKFSAAQAMEKVNCEVKVSSSRINFCNGNHHI ISLVQNPYGLY
SARS-CoV-2 S2 EC +L YV+QQL + ++ SA A K++ECV QS R++FCG G H++S Q+AP+G+
QSLQTYVTQQLIRAAEIRASANLAATKMSECVLGQSKRVDFCGKGYHLSMSPQ SAPHGVV

OC43 S2 EC   FIHFNYVPTKYVTAKVSPGLCIAGNRGIAPKSGYFVNVNNTWMTGSGYYPPEPITENNV
SARS-CoV-2 S2 EC F+H YVP +      +P +C G +      P+ G FV+      W T      +Y P+ IT +N
FLHVTYVPAQEKNFTTAPAICH DG-KAHFPREGV FVSNHGW FVTQRNFYEPQIITTDNT

OC43 S2 EC   VVMSTCAVNYTKAPYVMLNTSIPNLPDFKEELDQWFKNQTSVAPDLS-LDYINVTFLDLQ
SARS-CoV-2 S2 EC V C V      + + P L FKEELD++FKN TS DL + IN + +++Q
FVSGNCDVVIGIVNNTVYDPLQPELDSFKEELDKYFKNHTSPDVDLGDISGINASV VNIQ

OC43 S2 EC   VEMNRLQEAIKVLNHSYINLKDITGYEYYVKWP   510
SARS-CoV-2 S2 EC E++RL E K LN S I+L+++G YE Y+KWP
KEIDRLNEVAKNLNESLIDLQELGKYEQYIKWP   528

```

**Spike protein amino acid sequence homology between SARS-CoV-2 and the OC43 seasonal betacoronavirus.** Number of identical or conserved amino acid residues and sequence alignment of the SARS-CoV-2 spike S1 RBD and OC43 Spike S1 B domain (panel A). Number of identical or conserved amino acid residues and sequence alignment of the SARS-CoV-2 and OC43 Spike S2 subunits (panel B).

## A

### Identities 25/99 (25%) Conservative substitutions 13/99 (13%)

|                   |                                                                                                       |
|-------------------|-------------------------------------------------------------------------------------------------------|
| HKU1 S1 B domain  | CDIDKWLNNFNVPSPLNWERKIFSNCNFNLSLTLRLVHTDSFSCNNFDESKIYGSCFKSI                                          |
| SARS-CoV-2 S1 RBD | C + N S W RK SNC + S L +F C +K+ CF ++<br>CPFGVEFNATRFASVYAWNRKRISNCVADYSVLYNSASFSTFKCYGVSPTKLNDLCFTNV |
| HKU1 S1 B domain  | VLDKFAIPNSRRSDLQLGSSGFLOSSNYKIDTTSSSCQL 104                                                           |
| SARS-CoV-2 S1 RBD | D F I + G +G + NYK+ + C +<br>YADSFVIRGDEVRQIAPGQTGKIADYNYKLPDDFTGCVI 116                              |

## B

### Identities 211/514 (41%) Conservative substitutions 96/514 (19%)

|                  |                                                                                                                              |
|------------------|------------------------------------------------------------------------------------------------------------------------------|
| HKU1 S2 EC       | IKIPTNFTIIVGQEEFIQTNSPKVTIDCSLFVCSNYAACHDLLSEYGTFCDNINSILDEVN                                                                |
| SARS-CoV-2 S2 EC | I IPTNFTI E + + K ++DC++++C + C +LL +YG+FC +N L +<br>IAIPTNFTIISVTTEILPVSMTKTSVDCTMYICGDSTECNLLLQYGSFCTQLNRALTGIA            |
| HKU1 S2 EC       | GLLDDTQLHVADTLMQGVTLSSNLNTNLHFDVDNINFKSLVGLPHCGSSRSFFEDLL                                                                    |
| SARS-CoV-2 S2 EC | D V + Q T D NF + L S RSF EDLL<br>VEQDKNTQEVFAQVKQ-----IYKTPPIKDFGGFNFSQI---LPDPSPKPSKRSFIEDLL                                |
| HKU1 S2 EC       | FDKVKLSDVGFVEAYNCTGGSEIRDLLCVQSFNGIKVLPPILESQISGYTTAATVAAM                                                                   |
| SARS-CoV-2 S2 EC | F+KV L+D GF++ Y +C G RDL+C Q FNG+ VLPP+L++ I+ YT+A +<br>FNKVTLADAGFIKQYGDCLGDIAARDLICAQKFNGLTVLPPLLTDEMIQYTSALLAGTI          |
| HKU1 S2 EC       | FPPWSAAAAG----IPFSLNVQYRINGLGVMTDVLNKNQKLIATAFNNALLSIQNGFSATN                                                                |
| SARS-CoV-2 S2 EC | W+ AG IPF++ + YR NG+GVT +VL +NQKLI A FN+A+ IQ+ S+T<br>TSGWTFGAGAALQIPFAMQMAYRFNGIGVTQNVLYENQKLIANQFNSAIGKIQDSLSTSA           |
| HKU1 S2 EC       | SALAKIQSVVNSNAQALNSLLQQLFNKFGAISSSLQEILSRLDALEAQVQIDRLINGRLT                                                                 |
| SARS-CoV-2 S2 EC | SAL K+Q VVN NAQALN+L++QL + FGAISS L +ILSRLD +EA+VQIDRLI GRL<br>SALGKQLQDVVNQNAQALNTLVKQLSSNFGAISSVLNDILSRLDKVEAEVQIDRLITGRLQ |
| HKU1 S2 EC       | ALNAYVSQQLSDISLVKFGAALAMEKVNCEVKSQSPRINFCGNGNHILSLVQNAPYGLLF                                                                 |
| SARS-CoV-2 S2 EC | +L YV+QQL + ++ A LA K++ECV QS R++FCG G H++S Q+AP+G++F<br>SLQTYVTQQLIRAAEIRASANLAATKMSECVLGQSKRVDFCGKGYHLSFPQSAPHGVVF         |
| HKU1 S2 EC       | MHFSYKPI SFKTVLVSPGLCISGDVGIAPKQGYFIKHNDHWMFTGSSYYYPEPISDKNVV                                                                |
| SARS-CoV-2 S2 EC | +H +Y P K +P +C G P++G F+ + HW T ++Y P+ I+ N<br>LHVTVVPAQEKNFTTAPAI CHDGAHF-PREGV FVSNGTWHWFVTQRNFYEPQIITDNTF                |
| HKU1 S2 EC       | FMNTCVSNFTKAPLVVLNHSVPKLSDFESELHWFKNQTSIAPNLTL-NLHTINATFLDL                                                                  |
| SARS-CoV-2 S2 EC | C V + P+L F+ EL +FKN TS P++ L ++ INA+ +++<br>VSGNCDVVIGIVNNTVYDPLQPELDSFKEELDKYFKNHTS--PDVDLGDISGINASVUNI                    |
| HKU1 S2 EC       | YYEMNLIQESIKSLNNSYINLKDIGTYEMYVKWP 511                                                                                       |
| SARS-CoV-2 S2 EC | E++ + E K+LN S I+L+++G YE Y+KWP<br>QKEIDRLNEVAKNLNESLIDLQELGKYEQYIKWP 528                                                    |

**Spike protein amino acid sequence homology between SARS-CoV-2 and the HKU1 seasonal betacoronavirus.** Number of identical or conserved amino acid residues and sequence alignment of the SARS-CoV-2 spike S1 RBD and HKU1 Spike S1 B domain (panel A). Number of identical or conserved amino acid residues and sequence alignment of the SARS-CoV-2 and HKU1 Spike S2 subunits (panel B).



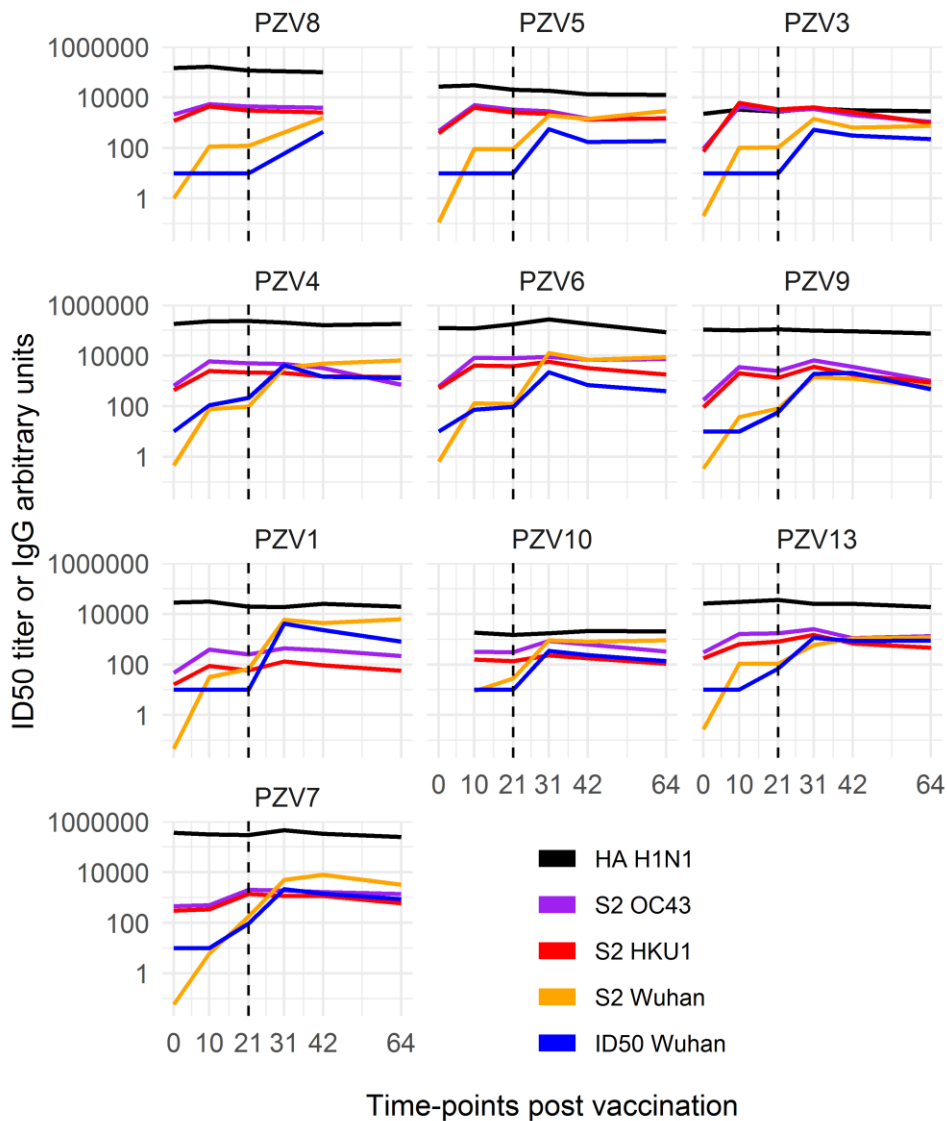

**The antibody response to the pandemic H1N1 flu virus HA antigen is not affected by vaccination.** The lineplots show the temporal profile post BNT162b2 vaccination of antibody levels in binding or neutralization assays in a selection of SARS-CoV-2 naïve BNT162b2 vaccinees. HA antibodies show modest fluctuation over time that are not synchronous with those against betacoronaviruses' antigens. The dashed line indicates the second BNT162b2 jab timepoints.

A

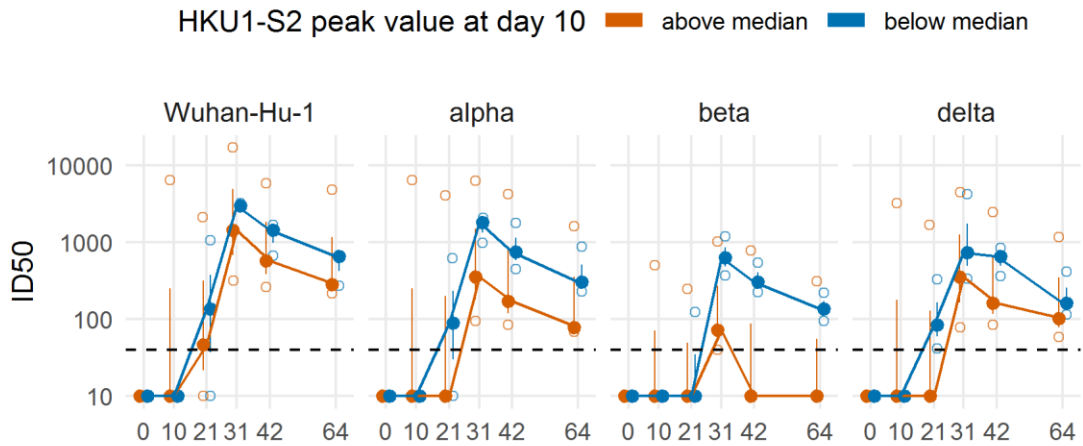

B

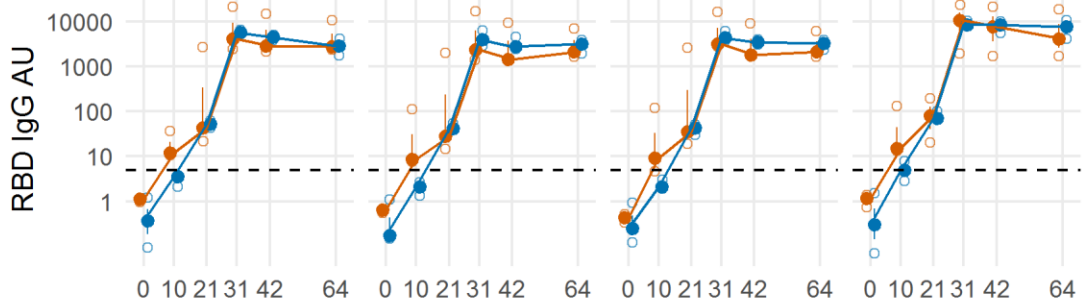

**In vaccinees with previous COVID-19 and SARS-CoV-2 antibody negative at baseline, an early boost of HKU1 IgGs post-vaccination is associated with a trend towards a more rapid decrease of Nabs titers but not RBD IgG binding antibodies** The lineplots show the temporal profile of antibody levels in neutralizing (upper panels) or binding (lower panels) antibody assays using antigens from the indicated SARS-CoV-2 variants. Subjects were stratified according to HKU1 S2 spike IgG levels above or below the median at day 10 post vaccination. The observed difference between the two strata did not reach statistical significance (two-way repeated measures ANOVA  $p$  adjusted = ns).

A

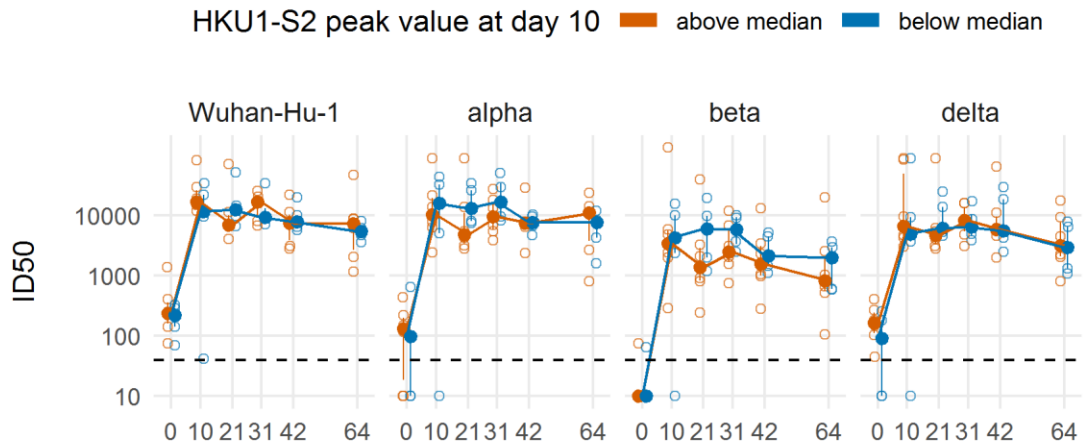

B

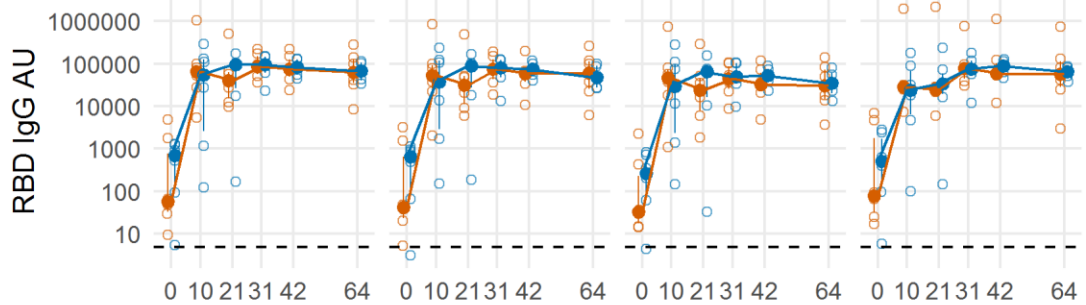

**In vaccinees with previous COVID-19 and SARS-CoV-2 antibody positive at baseline, higher early IgG to the HKU1 S2 spike post BNT162b2 vaccination are not associated with later Nabs titers or RBD IgG binding antibodies** The lineplots show the temporal profile of antibody levels in neutralizing (upper panels) or binding (lower panels) antibody assays using antigens from the indicated SARS-CoV-2 variants. Subjects were stratified according to HKU1 S2 spike IgG levels above or below the median at day 10 post vaccination. No significant differences between the two strata were observed in a two-way repeated measures ANOVA.
